# Supplementary material for: Why is surface diffusion the same in ultrastable, ordinary, aged, and ultrathin molecular glasses?
Source: Royal Society of Chemistry journal article supplement (doi:10.1039/c7cp05357f), 2017-01-01
Supplement: c7cp05357f1.pdf [file c7cp05357f1.pdf]

## Supplementary Information

### Why Surface Diffusion is the Same in Ultrastable, Ordinary, Aged, and Ultrathin Molecular Glasses?

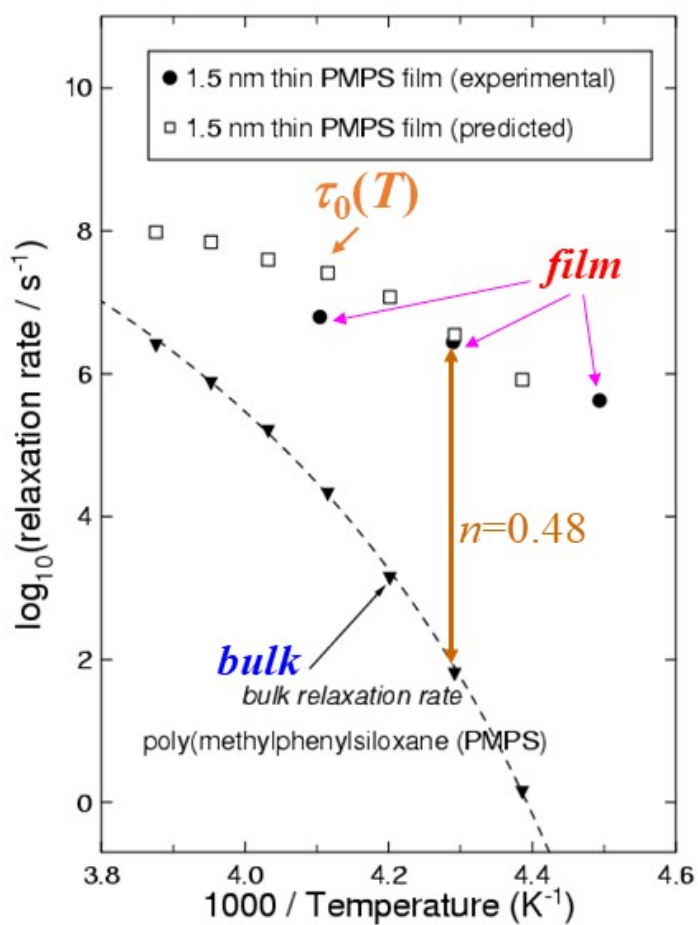

**Figure S1.** Arrhenius plot of the experimental  $\alpha$ -relaxation times (triangles) and the calculated primitive relaxation times  $\tau_0$  (open squares) of bulk PMPS. The dashed line is the Vogel-Fulcher fit to the  $\alpha$ -relaxation times of bulk PMPS. The filled circles are the relaxation times  $\tau_{\text{film}}$  of the 1.5 nm thin film. There is good agreement between  $\tau_{\text{film}}$  and  $\tau_0$ .

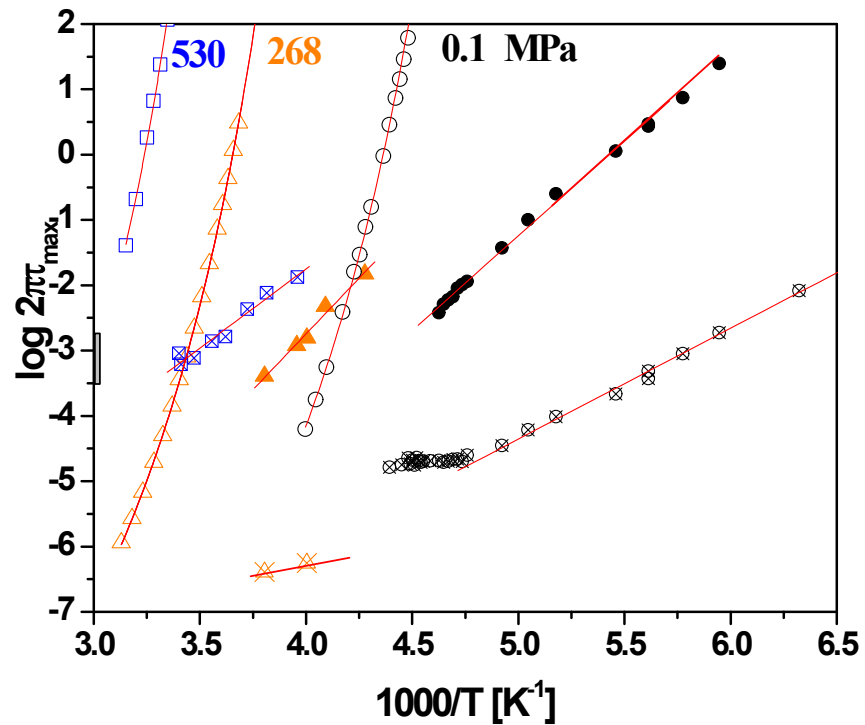

**Figure S2.** Relaxation map representing the structural (open symbols), the secondary JG (closed symbols) and the  $\gamma$ - (crossed symbols) relaxation times in di-propylene glycol dibenzoate (DiPGDB) as a function of inverse temperature for three different isobaric conditions: 0.1 MPa (circles), 268 MPa (triangles), 530 MPa (squares). At the reference temperature where  $2\pi\tau_{\alpha}=100$  s the value of  $\tau_{JG}$  is almost constant within the range represented by the grey rectangle on the y-scale.

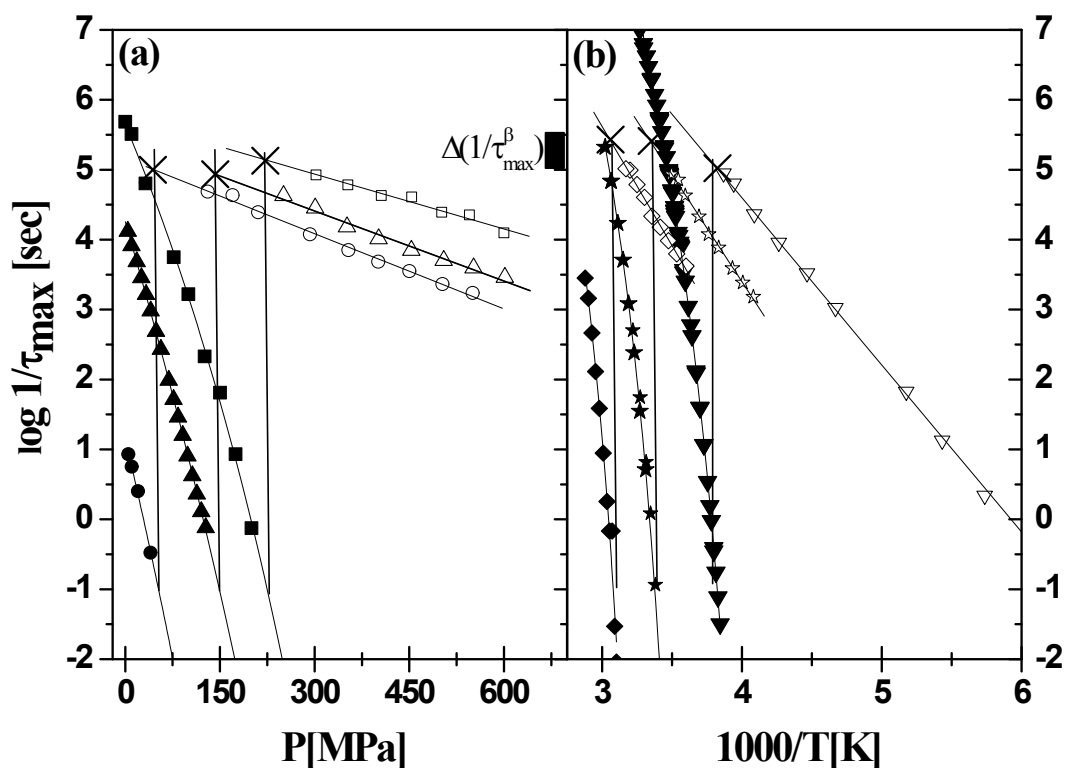

**Figure S3.** Poly(phenylglycidylether) (PPGE). (a) Pressure dependence of the logarithm of  $\tau_{\max}$  for the  $\alpha$ - (full symbols) and the  $\beta$ - (open symbols) process, at two different values of  $T$ : 293 (squares), and 267.6 K (circles) (b) Temperature dependence of the logarithm of  $\tau_{\max}$  for the  $\alpha$ - (full symbols) and the  $\beta$ - (open symbols) process, at two different values of pressure: 0.1 (triangles), 240 MPa (stars), and 500 MPa (diamonds). In both panels the continuous lines represent fit with the VFT ( $\alpha$ -relaxation) and Arrhenius ( $\beta$ -relaxation) equations. The horizontal dotted line shows the relaxation time value used to define the glass transition. Crosses are the extrapolated values of  $\tau_{\beta\max}$  at  $(T, P)$ s.

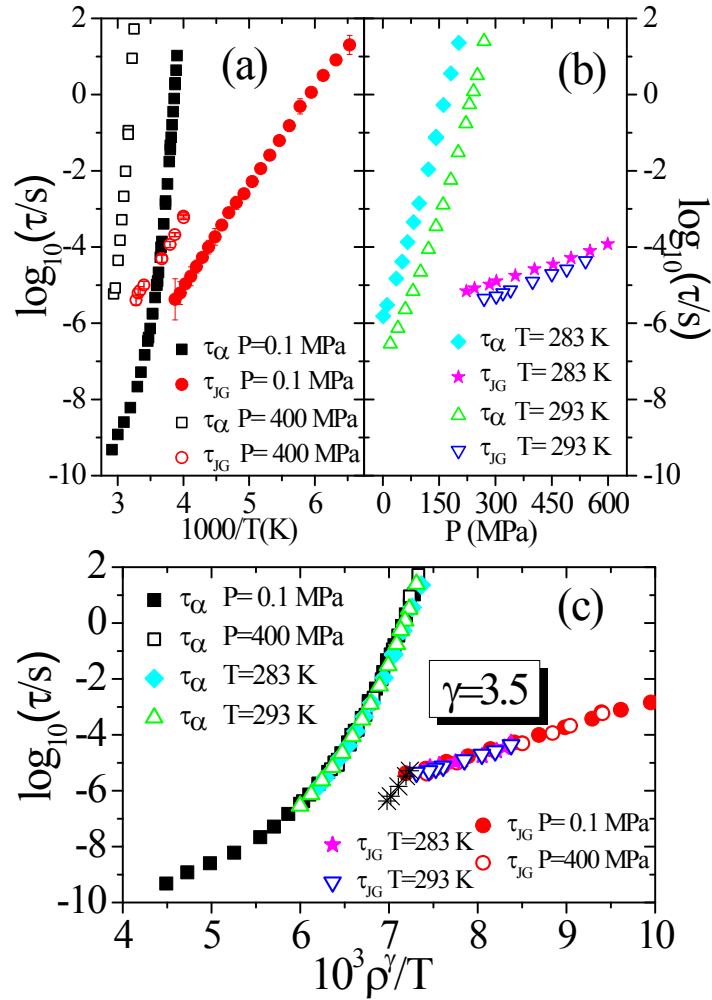

**Figure S4.** Logarithm of characteristic time of dielectric loss maximum of DGEBA (diglycidyl ether of bisphenol-A,  $M_w=380$  g/mol, also known as EPON 828) for  $\alpha$ -relaxation and JG  $\beta$ -relaxation in isobaric condition versus reciprocal temperature (a), and in isothermal condition versus pressure (b), and an overall plot of the same data versus  $\rho^\gamma/T$  (c). When not shown, error bars are smaller than symbol size. Black asterisks in panel (c) indicates the values for  $\log_{10}(\tau_0)$  at several state points calculated by the Coupling Model Eq.(10) with the stretch exponent  $\beta_k=(1-n)=0.52$  obtained by fitting the frequency dispersion of the  $\alpha$ -relaxation by the Fourier transform of the Kohlrausch-Williams-Watts function, Eq.(2). Density data in the glassy state have been extrapolated from the values of glass compressibility and expansivity.
